# Supplementary material for: Overexpression of GmPAP4 Enhances Symbiotic Nitrogen Fixation and Seed Yield in Soybean under Phosphorus-Deficient Condition
Source: MDPI journal article supplement (doi:10.3390/ijms25073649), 2024-03-25
Supplement: s1 [file s1]

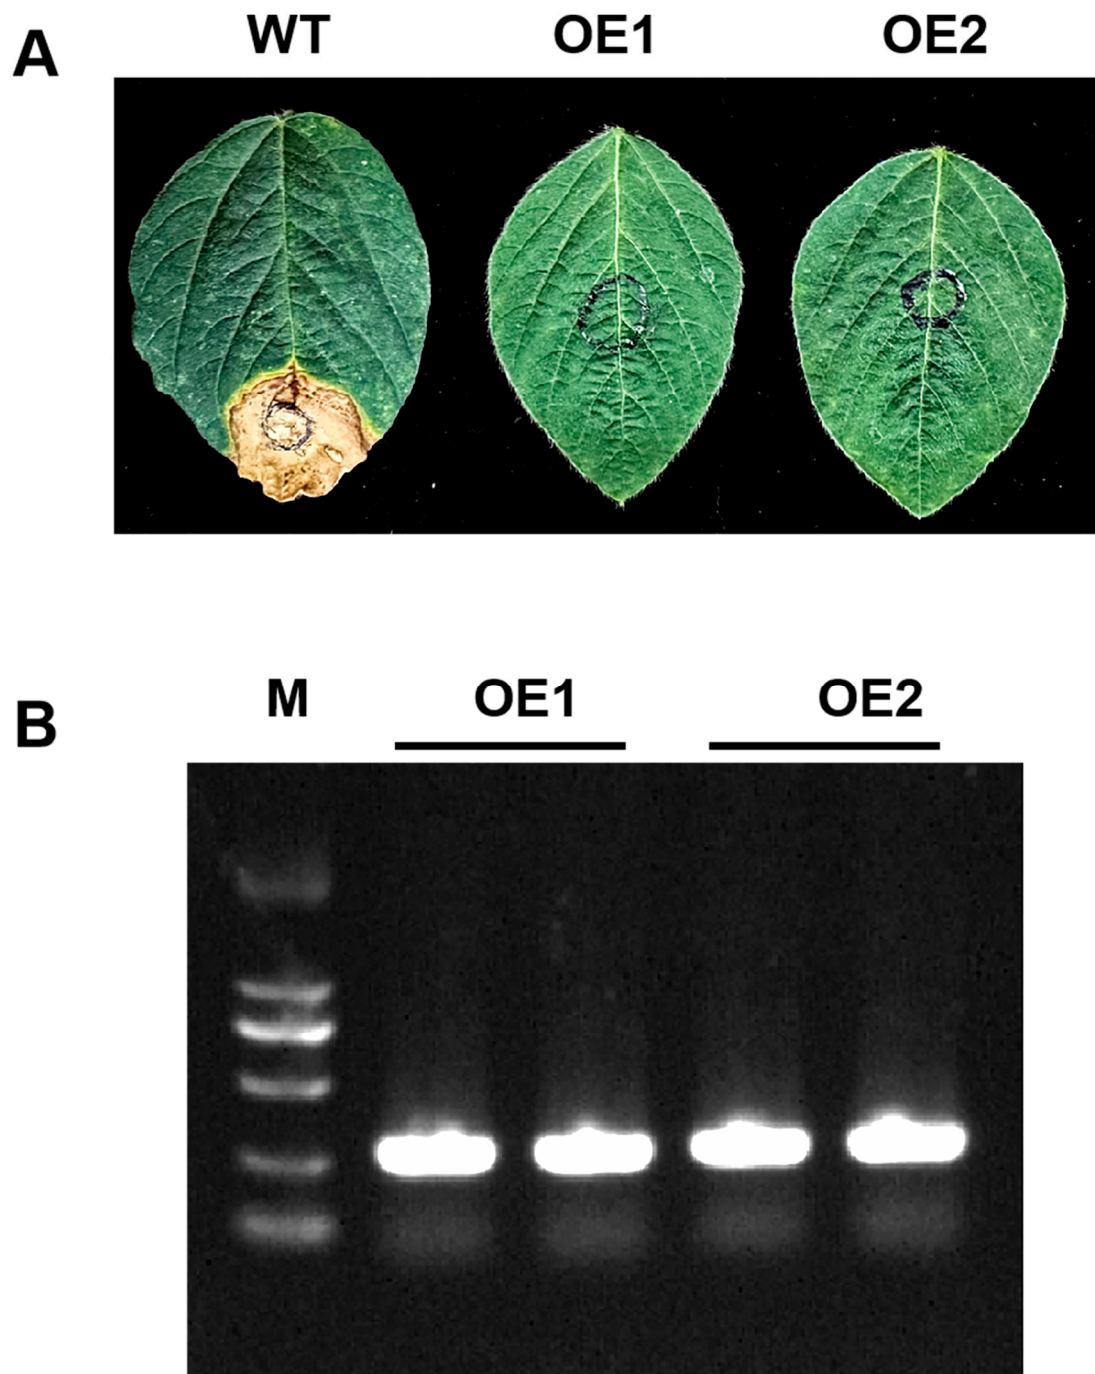

**Figure S1.** Identification of positive stable transgenic *GmPAP4* OE lines. A. Identification of positive transgenic OE lines through glyphosate resistance detection. B. Identification of positive transgenic OE lines through PCR targeting bialaphos resistance gene.

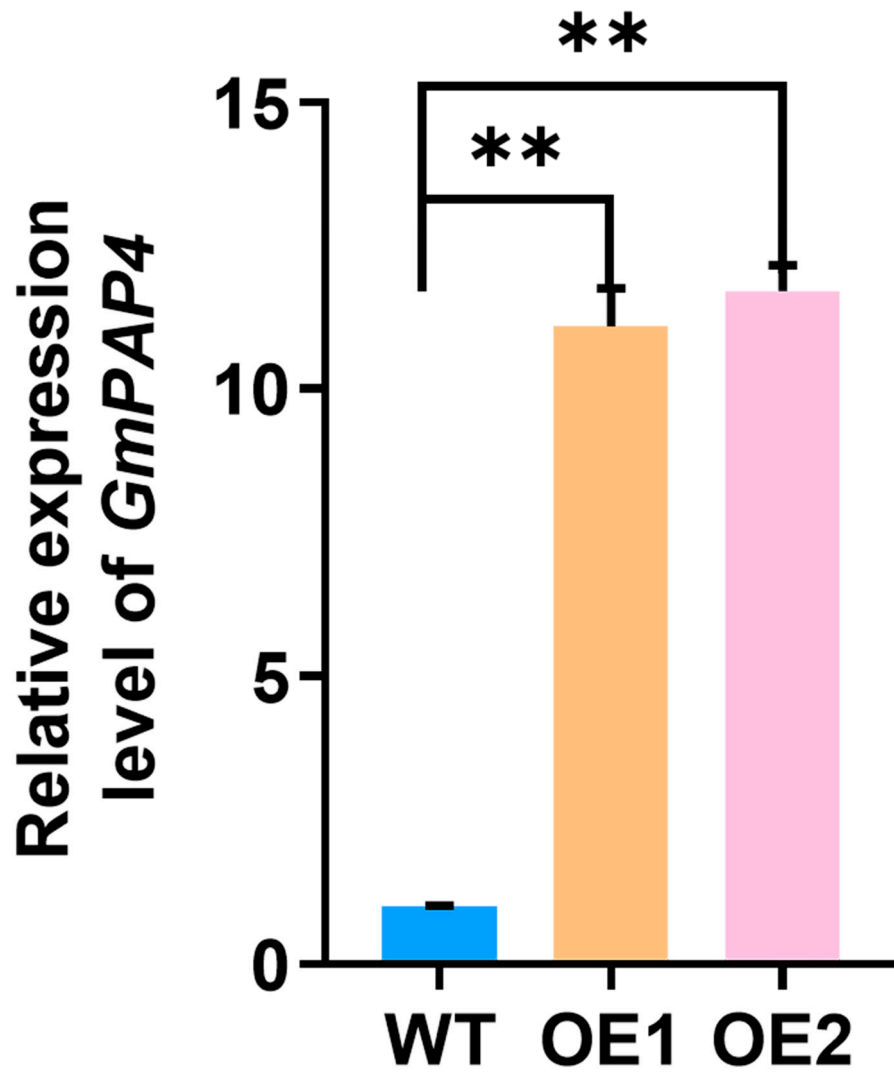

**Figure S2.** Relative transcript accumulation of GmPAP4 in nodules of OE lines at 28 dpi.

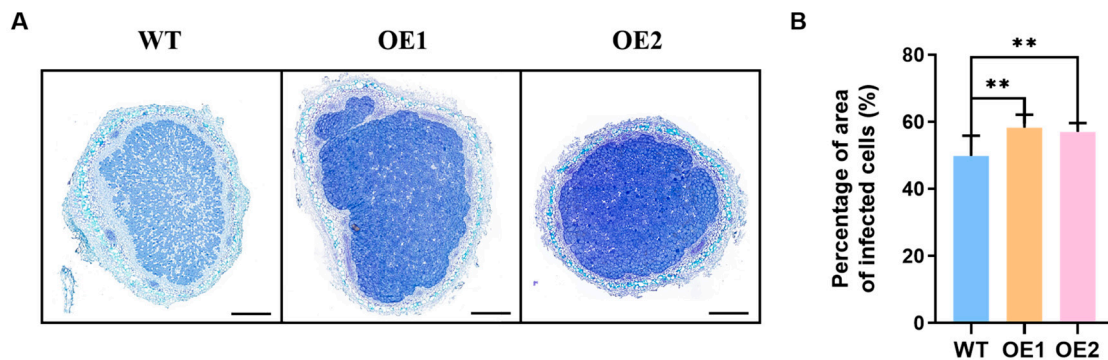

**Figure S3.** Interior structural characteristics of nodules formed on *GmPAP4* OE lines. (A) Toluidine blue staining of nodules. (B) Percentage of area of rhizobia-infected cells to all cells in one nodule section. (A) Scale bar =500 $\mu$ m. Asterisks indicate statistically significant differences according to Student's t-test (two-tailed) (\*\*P<0.01).
